# Supplementary material for: Kinetics of the defunctionalization of oxidized few-layer graphene nanoflakes
Source: Royal Society of Chemistry journal article supplement (doi:10.1039/c8cp05149f), 2018-01-01
Supplement: c8cp05149f1.pdf [file c8cp05149f1.pdf]

## Electronic Supplementary Information

For the article “**Kinetics of the defunctionalization of oxidized few-layer graphene nanoflakes**” by Sergei A. Chernyak, Anton S. Ivanov, Angelina M. Podgornova, Ekaterina A. Arkhipova, Stepan Yu. Kupreenko, Alexei V. Shumyantsev, Natalia E. Strokova, Konstantin I. Maslakov, Serguei V. Savilov, Valery V. Lunin.

### Kissinger's plots

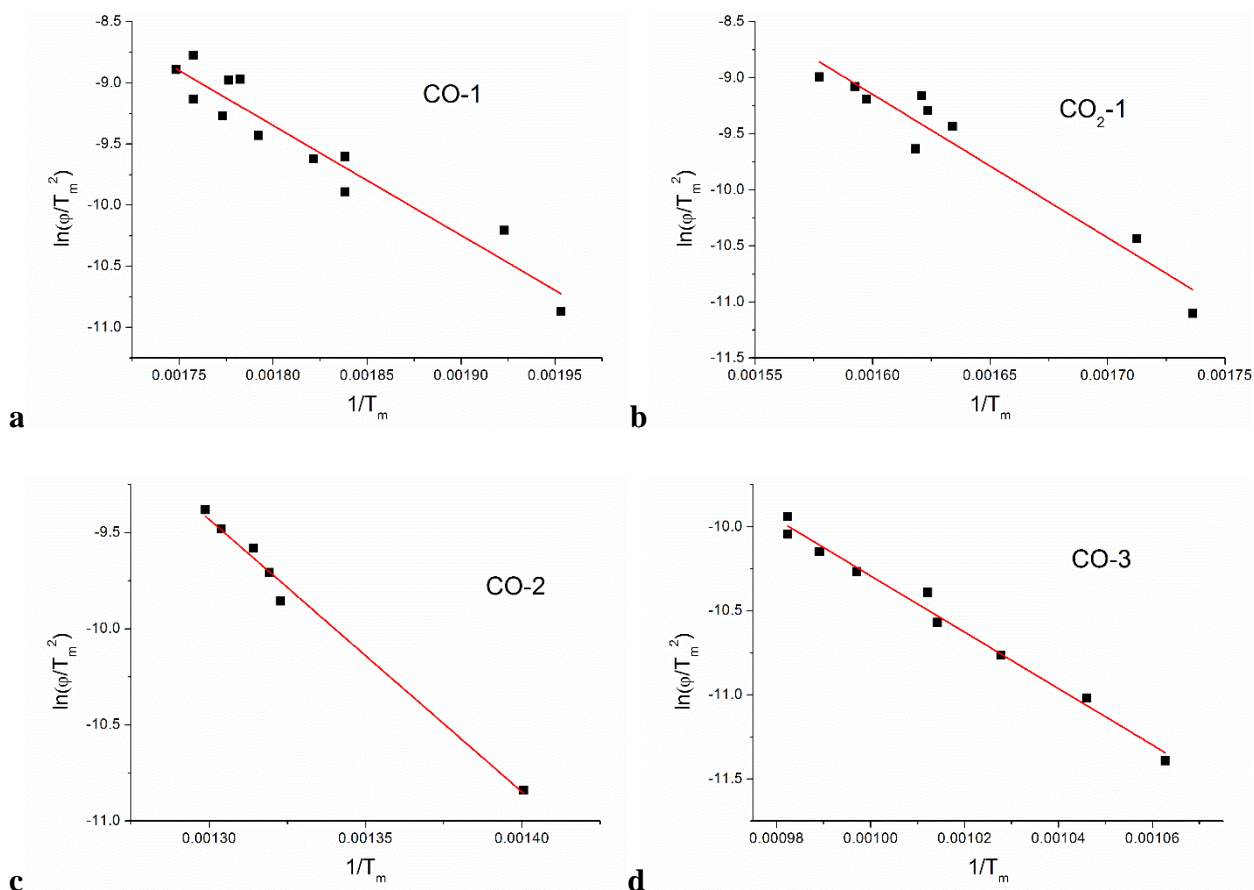

Fig.S1. Kissinger's plots for the decomposition processes marked in Fig.3 for the GNF1 sample.  $\phi$  is the heating rate (in K/min);  $T_m$  means the peak temperature (in K) of corresponding component marked in Fig.3.

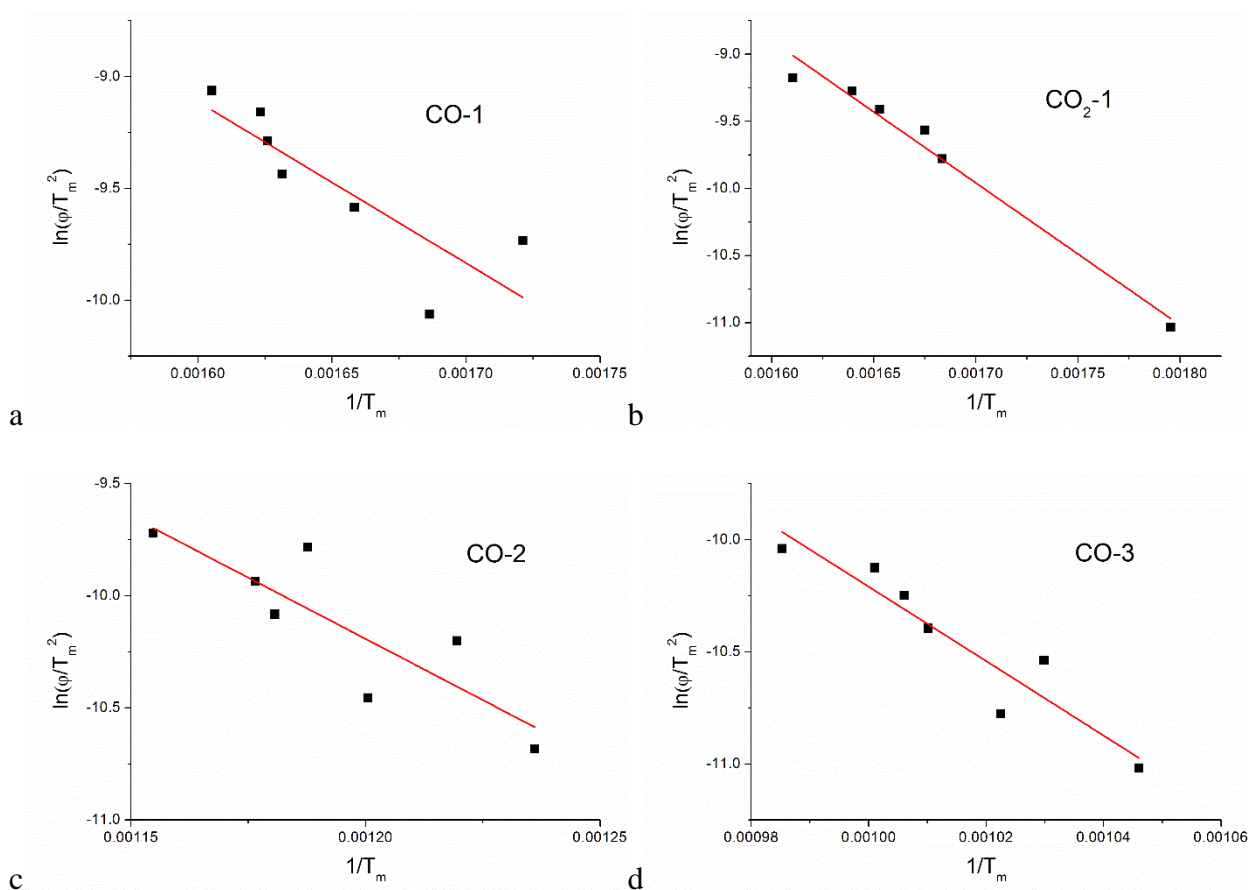

Fig.S2. Kissinger's plots for the decomposition processes marked in Fig.3 for the GNF2 sample.  $\phi$  is the heating rate (in K/min);  $T_m$  means the peak temperature (in K) of corresponding component marked in Fig.3.

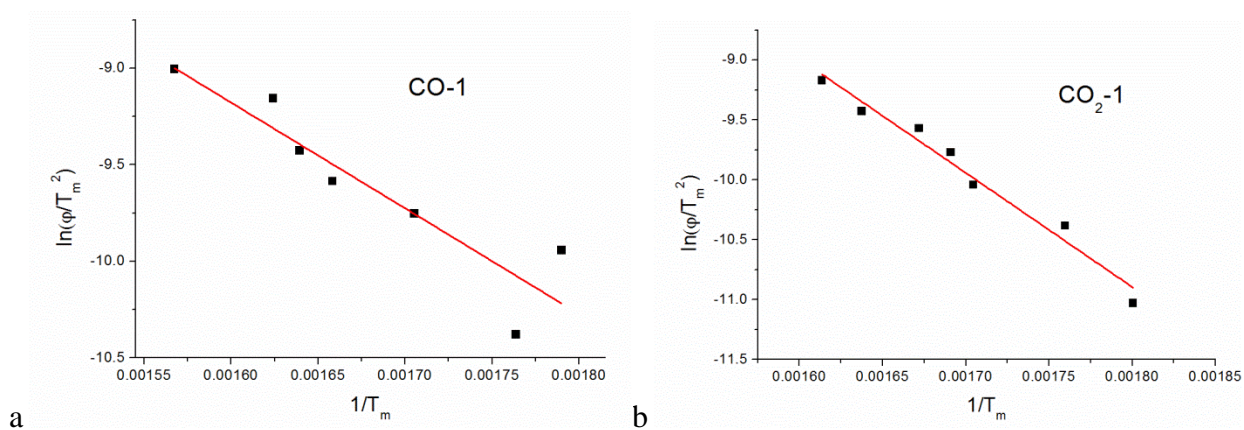

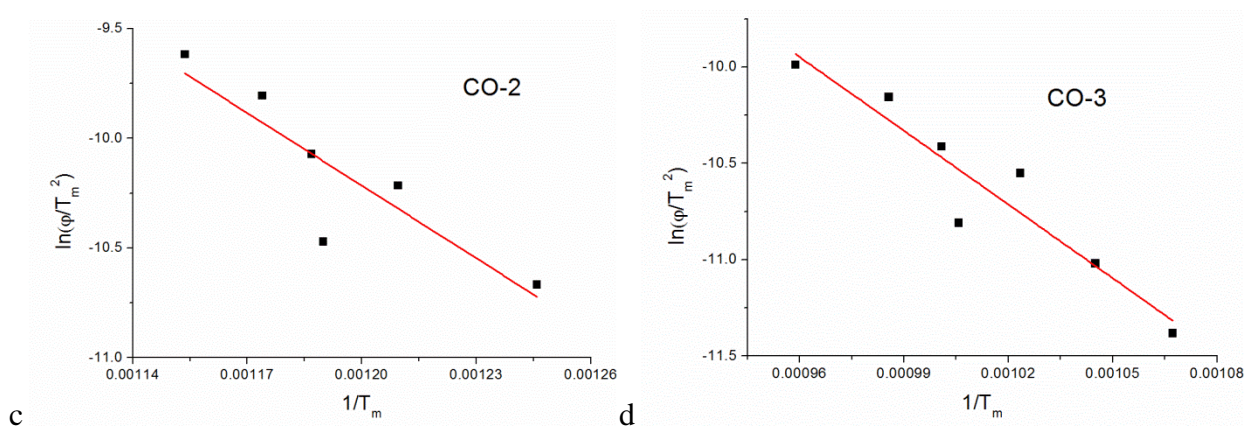

Fig.S3. Kissinger's plots for the decomposition processes marked in Fig.3 for the GNF3 sample.  $\phi$  is the heating rate (in K/min);  $T_m$  means the peak temperature (in K) of corresponding component marked in Fig.3.

### XPS data

Table S1. Binding energies and concentrations of the components in O1s and C1s XPS spectra of the oxidized GNFs and CNTs

| Spectrum | Binding energy | Bond type      | Concentration (at. %) |      |      |      |
|----------|----------------|----------------|-----------------------|------|------|------|
|          |                |                | CNTs                  | GNF1 | GNF2 | GNF3 |
| O1s      | 531.6–531.7    | <u>O</u> =C    | 4.2                   | 3.2  | 7.6  | 9.5  |
|          | 533.2–533.7    | <u>O</u> –C    | 4.4                   | 4.1  | 7.5  | 8.1  |
| C1s      | 284.3–284.4    | C–C ( $sp^2$ ) | 78.3                  | 82.9 | 61.5 | 56.1 |
|          | 285.0–285.1    | C–C ( $sp^3$ ) | 7.0                   | 4.3  | 12.7 | 15.2 |
|          | 286.4–286.4    | <u>C</u> –O    | 2.1                   | 2.0  | 2.9  | 2.5  |
|          | 287.5          | <u>C</u> =O    | 0.7                   | 1.0  | 1.6  | 1.7  |
|          | 288.8          | O= <u>C</u> –O | 3.1                   | 2.0  | 5.4  | 6.0  |
